# Supplementary material for: What Motivates Us for Work? Intricate Web of Factors beyond Money and Prestige
Source: PLOS journal article supplement (doi:10.1371/journal.pone.0132641), 2015-07-15
Supplement: S1 (10.1371/journal.pone.0132641.s001) [file journal.pone.0132641.s001]

## **What motivates us for work? Intricate web of factors beyond money and prestige**

Nadja Damij (1), Zoran Levnajić (1,2,3), Vesna Rejec Skrt (4), Jana Suklan (2,5)

(1) Faculty of Information Studies in Novo mesto, Novo mesto, Slovenia

(2) School of Advanced Social Studies, Nova Gorica, Slovenia

(3) Faculty of Computer and Information Science, University of Ljubljana, Slovenia

(4) Varsi d.o.o., Stegne 35, Ljubljana, Slovenia

(5) Interdisciplinary Doctoral Study Programme in Statistics, University of Ljubljana, Slovenia

### **Supplementary information - Questionnaire**

Q1. In the first part of the questionnaire 30 factors are listed.

Think about a time in your life when you were mostly motivated at work. For each factor listed in the table below, please indicate if and how much it affected your motivation height.

Focus on an ideal situation, not the actual situation in the company in which you are currently working.

Factors rated from 1 (factor does not affect my work motivation at all) to 6 (factor COMPLETELY affect my work motivation).

|                                          | 1 | 2 | 3 | 4 | 5 | 6 |
|------------------------------------------|---|---|---|---|---|---|
| Sense of achievement                     |   |   |   |   |   |   |
| Recognition by the leader or employees   |   |   |   |   |   |   |
| Overview of the workflow                 |   |   |   |   |   |   |
| Responsibility                           |   |   |   |   |   |   |
| Advancement opportunities                |   |   |   |   |   |   |
| Personal growth                          |   |   |   |   |   |   |
| Clear vision and strategy of the company |   |   |   |   |   |   |

|                                                |  |  |  |  |  |  |
|------------------------------------------------|--|--|--|--|--|--|
| Organized company                              |  |  |  |  |  |  |
| Minimum supervision                            |  |  |  |  |  |  |
| Good relations with superiors                  |  |  |  |  |  |  |
| Favourable working conditions                  |  |  |  |  |  |  |
| Good salary and awards                         |  |  |  |  |  |  |
| Good relations with colleagues                 |  |  |  |  |  |  |
| Work does not interfere with my privacy        |  |  |  |  |  |  |
| Reputable own status                           |  |  |  |  |  |  |
| Employment security                            |  |  |  |  |  |  |
| Independence at work                           |  |  |  |  |  |  |
| Business trips                                 |  |  |  |  |  |  |
| Socially useful work                           |  |  |  |  |  |  |
| Pride related to the organization              |  |  |  |  |  |  |
| Interesting work                               |  |  |  |  |  |  |
| Teamwork                                       |  |  |  |  |  |  |
| Participation in the management of the company |  |  |  |  |  |  |
| Praise from superiors and colleagues           |  |  |  |  |  |  |

|                       |  |  |  |  |  |  |
|-----------------------|--|--|--|--|--|--|
| Work as a challenge   |  |  |  |  |  |  |
| Entertaining work     |  |  |  |  |  |  |
| Flexible working time |  |  |  |  |  |  |
| Good collaborators    |  |  |  |  |  |  |
| High-tech technology  |  |  |  |  |  |  |
| Various benefits      |  |  |  |  |  |  |

Q2. In the second part of the questionnaire there are re-listed 30 factors. It is very important that you do not think about how you evaluated the first set, it's not the same thing. Nor is it necessary that the same factor also affects your frustration and your motivation. For example, factor X (eg. a challenge, working conditions ...) it is possible that cause you high dissatisfaction if not present; while if present it does not motivate you because you take them for granted.

Think about a time in your life when you were mostly dissatisfied at work. For each factor listed in the table below, please indicate if and how much it affected your level of dissatisfaction.

Factors rated from 1 (factor does not affect my work dissatisfaction at all) to 6 (factor COMPLETELY affect my work dissatisfaction).

|                                           | 1 | 2 | 3 | 4 | 5 | 6 |
|-------------------------------------------|---|---|---|---|---|---|
| No sense of achievement                   |   |   |   |   |   |   |
| No recognition by the leader or employees |   |   |   |   |   |   |
| No overview of the workflow               |   |   |   |   |   |   |
| No responsibility                         |   |   |   |   |   |   |
| No advancement opportunities              |   |   |   |   |   |   |
| No opportunities for personal growth      |   |   |   |   |   |   |

|                                                 |  |  |  |  |  |  |
|-------------------------------------------------|--|--|--|--|--|--|
| No clear vision and strategy of the company     |  |  |  |  |  |  |
| Not a well-organized company                    |  |  |  |  |  |  |
| Strict supervision                              |  |  |  |  |  |  |
| Bad relations with superiors                    |  |  |  |  |  |  |
| Unfavourable working conditions                 |  |  |  |  |  |  |
| Poor salary and no awards                       |  |  |  |  |  |  |
| Bad relations with colleagues                   |  |  |  |  |  |  |
| Work interfering with my privacy                |  |  |  |  |  |  |
| Non-reputable own status                        |  |  |  |  |  |  |
| No employment security                          |  |  |  |  |  |  |
| No independence at work                         |  |  |  |  |  |  |
| No business trips                               |  |  |  |  |  |  |
| Socially not useful work                        |  |  |  |  |  |  |
| No pride related of the organization            |  |  |  |  |  |  |
| Not an interesting work                         |  |  |  |  |  |  |
| No teamwork                                     |  |  |  |  |  |  |
| No option about participation in the management |  |  |  |  |  |  |

|                                         |  |  |  |  |  |  |
|-----------------------------------------|--|--|--|--|--|--|
| No praise from superiors and colleagues |  |  |  |  |  |  |
| Don't see work as a challenge           |  |  |  |  |  |  |
| Boring work                             |  |  |  |  |  |  |
| Non flexible working hours              |  |  |  |  |  |  |
| Bad collaborators                       |  |  |  |  |  |  |
| No high-tech technology                 |  |  |  |  |  |  |
| No benefits                             |  |  |  |  |  |  |

For the end I will ask you some demographic information. The data collected will be analysed and a summary appear only in summary form and used exclusively for scientific research purposes.

Q3 - Year of Birth

Q4 - Living in:

|              |             |                        |
|--------------|-------------|------------------------|
| Major cities | Small towns | Village or rural areas |
|--------------|-------------|------------------------|

Q5 - The level of the last completed education:

|             |                    |
|-------------|--------------------|
| High school | University or more |
|-------------|--------------------|

Q6 - The average net monthly earnings:

|                |                  |                  |                 |
|----------------|------------------|------------------|-----------------|
| up to € 700.00 | up to € 1,000.00 | up to € 1,500.00 | 1,500 or more € |
|----------------|------------------|------------------|-----------------|

Q7 - Employed in:

|               |                |
|---------------|----------------|
| public sector | private sector |
|---------------|----------------|
