# Supplementary material for: What Motivates Us for Work? Intricate Web of Factors beyond Money and Prestige
Source: PLoS One. 2015 Jul 15;10(7):e0132641. doi: 10.1371/journal.pone.0132641 (PMC4503444; doi:10.1371/journal.pone.0132641)
Supplement: S2 File — (XLSX) [file pone.0132641.s002.xlsx]

## Sheet: motiv
Motivators	Sense of achievement	Recognition by the leader or employees	Overview of workflow	Responsibility	Possibility of promotion	Personal growth	Strategy	Organised company	Minimum supervision	Relations with superiors	Favorable working conditions	Salary	Relationships with colleagues	Free time	Reputable own status	Job security	Independence at work	Business trips	Socially useful work	Pride on the organization	Interesting work	Teamwork	Participation in the management of the company	Praise from superiors and colleagues	Work as a challenge	Entertaining job	Flexible working time	Helpful coworkers	High-tech	Benefits
Sense of achievement	1	0.419998	0.330065	0.312796	0.152459	0.302043	0.168955	0.15827	0.121467	0.236319	0.208027	0.136164	0.251229	0.0178473	0.130655	0.0916889	0.213586	0.0539531	0.133792	0.208373	0.359666	0.147134	0.111696	0.341948	0.290346	0.137128	0.0908614	0.298052	0.0610424	-0.033467
Recognition by the leader or employees	0.419998	1	0.263568	0.283182	0.421327	0.240643	0.219641	0.305128	0.166611	0.447678	0.316414	0.322687	0.322489	0.170445	0.236871	0.287735	0.152876	0.0569217	0.182959	0.293907	0.253668	0.248529	0.147656	0.595864	0.210021	0.198748	0.0982663	0.296872	0.104902	0.125267
Overview of workflow	0.330065	0.263568	1	0.523532	0.269082	0.335246	0.382157	0.350773	0.226169	0.283494	0.337477	0.155177	0.194084	0.107209	0.235444	0.141755	0.306844	0.0951454	0.151837	0.298191	0.31448	0.165819	0.188609	0.203045	0.337821	0.144785	0.223117	0.227195	0.234899	0.130021
Responsibility	0.312796	0.283182	0.523532	1	0.396074	0.42741	0.372606	0.315658	0.221849	0.190307	0.187631	0.0864092	0.12554	-0.0062223	0.222978	0.179597	0.2603	0.18799	0.114395	0.345404	0.2558	0.111259	0.22997	0.202474	0.424017	0.166257	0.229287	0.194466	0.266235	0.0570655
Possibility of promotion	0.152459	0.421327	0.269082	0.396074	1	0.444395	0.395902	0.329784	0.217079	0.206262	0.272778	0.371779	0.202215	0.124195	0.386645	0.308345	0.161351	0.287777	0.166192	0.24137	0.164172	0.112363	0.274524	0.393056	0.213504	0.203543	0.146208	0.195856	0.234642	0.240078
Personal growth	0.302043	0.240643	0.335246	0.42741	0.444395	1	0.474626	0.459613	0.329078	0.270692	0.318449	0.179112	0.272488	0.122852	0.265037	0.178677	0.301369	0.295534	0.250437	0.334219	0.403641	0.298509	0.256773	0.301773	0.483654	0.233564	0.170061	0.234327	0.203147	0.128914
Strategy	0.168955	0.219641	0.382157	0.372606	0.395902	0.474626	1	0.698452	0.300787	0.282224	0.196698	0.230458	0.223795	0.069258	0.215353	0.226476	0.290486	0.230172	0.229106	0.372904	0.305233	0.300803	0.357007	0.223969	0.410846	0.19601	0.205882	0.274808	0.216858	0.110694
Organised company	0.15827	0.305128	0.350773	0.315658	0.329784	0.459613	0.698452	1	0.363298	0.437151	0.34425	0.248809	0.349699	0.176811	0.290907	0.324284	0.316978	0.20742	0.243941	0.456119	0.37248	0.337553	0.303661	0.337774	0.319175	0.266098	0.21292	0.416917	0.219087	0.135266
Minimum supervision	0.121467	0.166611	0.226169	0.221849	0.217079	0.329078	0.300787	0.363298	1	0.381813	0.307868	0.182631	0.262558	0.264154	0.228352	0.208375	0.391136	0.307705	0.27077	0.192362	0.166942	0.11408	0.167049	0.140096	0.102731	0.128514	0.162026	0.198031	0.0448642	0.129065
Relations with superiors	0.236319	0.447678	0.283494	0.190307	0.206262	0.270692	0.282224	0.437151	0.381813	1	0.51466	0.313404	0.44875	0.192724	0.259552	0.310542	0.223944	0.0575583	0.225896	0.365205	0.27921	0.232523	0.148963	0.4651	0.193182	0.207474	0.228157	0.424399	0.128909	0.247498
Favorable working conditions	0.208027	0.316414	0.337477	0.187631	0.272778	0.318449	0.196698	0.34425	0.307868	0.51466	1	0.434804	0.425763	0.335919	0.269003	0.409339	0.230982	0.0633027	0.175533	0.282572	0.381229	0.191044	0.0759573	0.335884	0.232702	0.382264	0.342676	0.380166	0.26975	0.268397
Salary	0.136164	0.322687	0.155177	0.0864092	0.371779	0.179112	0.230458	0.248809	0.182631	0.313404	0.434804	1	0.355664	0.277496	0.328588	0.383354	0.0825414	0.150556	0.122864	0.171478	0.245233	0.191649	0.0612477	0.327258	0.117811	0.221318	0.204449	0.290649	0.237566	0.297055
Relationships with colleagues	0.251229	0.322489	0.194084	0.12554	0.202215	0.272488	0.223795	0.349699	0.262558	0.44875	0.425763	0.355664	1	0.338871	0.236465	0.265593	0.200605	0.0280494	0.23803	0.252839	0.306325	0.311252	0.0724332	0.360641	0.201945	0.258765	0.183835	0.552093	0.111279	0.184105
Free time	0.0178473	0.170445	0.107209	-0.0062223	0.124195	0.122852	0.069258	0.176811	0.264154	0.192724	0.335919	0.277496	0.338871	1	0.310596	0.393564	0.222973	0.0892386	0.181997	0.0749764	0.203682	0.110952	-0.100826	0.204495	-0.0476673	0.212161	0.157399	0.231616	0.185375	0.347063
Reputable own status	0.130655	0.236871	0.235444	0.222978	0.386645	0.265037	0.215353	0.290907	0.228352	0.259552	0.269003	0.328588	0.236465	0.310596	1	0.451112	0.221795	0.272555	0.105252	0.297383	0.212636	0.0994784	0.290822	0.399738	0.117374	0.0901303	0.133954	0.144602	0.314248	0.314417
Job security	0.0916889	0.287735	0.141755	0.179597	0.308345	0.178677	0.226476	0.324284	0.208375	0.310542	0.409339	0.383354	0.265593	0.393564	0.451112	1	0.170409	0.153522	0.194283	0.30379	0.187439	0.155811	0.119177	0.336709	0.065012	0.180559	0.182152	0.323546	0.337363	0.351557
Independence at work	0.213586	0.152876	0.306844	0.2603	0.161351	0.301369	0.290486	0.316978	0.391136	0.223944	0.230982	0.0825414	0.200605	0.222973	0.221795	0.170409	1	0.173107	0.227804	0.244985	0.336723	0.177534	0.220759	0.208937	0.356683	0.0880112	0.136706	0.209833	0.152725	0.00481991
Business trips	0.0539531	0.0569217	0.0951454	0.18799	0.287777	0.295534	0.230172	0.20742	0.307705	0.0575583	0.0633027	0.150556	0.0280494	0.0892386	0.272555	0.153522	0.173107	1	0.400285	0.205832	0.088615	0.189291	0.257761	0.207785	0.135787	0.190558	0.253565	0.0457067	0.187503	0.288763
Socially useful work	0.133792	0.182959	0.151837	0.114395	0.166192	0.250437	0.229106	0.243941	0.27077	0.225896	0.175533	0.122864	0.23803	0.181997	0.105252	0.194283	0.227804	0.400285	1	0.464806	0.200105	0.333607	0.208021	0.257626	0.234917	0.252067	0.202373	0.2343	0.0661584	0.255486
Pride on the organization	0.208373	0.293907	0.298191	0.345404	0.24137	0.334219	0.372904	0.456119	0.192362	0.365205	0.282572	0.171478	0.252839	0.0749764	0.297383	0.30379	0.244985	0.205832	0.464806	1	0.322884	0.445979	0.399016	0.354204	0.381288	0.202612	0.235891	0.306945	0.292845	0.288096
Interesting work	0.359666	0.253668	0.31448	0.2558	0.164172	0.403641	0.305233	0.37248	0.166942	0.27921	0.381229	0.245233	0.306325	0.203682	0.212636	0.187439	0.336723	0.088615	0.200105	0.322884	1	0.29183	0.214503	0.339971	0.447777	0.283003	0.228571	0.392339	0.243796	0.0893572
Teamwork	0.147134	0.248529	0.165819	0.111259	0.112363	0.298509	0.300803	0.337553	0.11408	0.232523	0.191044	0.191649	0.311252	0.110952	0.0994784	0.155811	0.177534	0.189291	0.333607	0.445979	0.29183	1	0.330278	0.298058	0.316934	0.210091	0.144384	0.347064	0.220232	0.205781
Participation in the management of the company	0.111696	0.147656	0.188609	0.22997	0.274524	0.256773	0.357007	0.303661	0.167049	0.148963	0.0759573	0.0612477	0.0724332	-0.100826	0.290822	0.119177	0.220759	0.257761	0.208021	0.399016	0.214503	0.330278	1	0.363748	0.330167	0.138228	0.158387	0.142479	0.255266	0.221287
Praise from superiors and colleagues	0.341948	0.595864	0.203045	0.202474	0.393056	0.301773	0.223969	0.337774	0.140096	0.4651	0.335884	0.327258	0.360641	0.204495	0.399738	0.336709	0.208937	0.207785	0.257626	0.354204	0.339971	0.298058	0.363748	1	0.299384	0.283044	0.14686	0.412588	0.23653	0.286548
Work as a challenge	0.290346	0.210021	0.337821	0.424017	0.213504	0.483654	0.410846	0.319175	0.102731	0.193182	0.232702	0.117811	0.201945	-0.0476673	0.117374	0.065012	0.356683	0.135787	0.234917	0.381288	0.447777	0.316934	0.330167	0.299384	1	0.337593	0.213881	0.279873	0.203123	0.115152
Entertaining job	0.137128	0.198748	0.144785	0.166257	0.203543	0.233564	0.19601	0.266098	0.128514	0.207474	0.382264	0.221318	0.258765	0.212161	0.0901303	0.180559	0.0880112	0.190558	0.252067	0.202612	0.283003	0.210091	0.138228	0.283044	0.337593	1	0.360463	0.282919	0.191854	0.304837
Flexible working time	0.0908614	0.0982663	0.223117	0.229287	0.146208	0.170061	0.205882	0.21292	0.162026	0.228157	0.342676	0.204449	0.183835	0.157399	0.133954	0.182152	0.136706	0.253565	0.202373	0.235891	0.228571	0.144384	0.158387	0.14686	0.213881	0.360463	1	0.29886	0.315755	0.249058
Helpful coworkers	0.298052	0.296872	0.227195	0.194466	0.195856	0.234327	0.274808	0.416917	0.198031	0.424399	0.380166	0.290649	0.552093	0.231616	0.144602	0.323546	0.209833	0.0457067	0.2343	0.306945	0.392339	0.347064	0.142479	0.412588	0.279873	0.282919	0.29886	1	0.21814	0.191286
High-tech	0.0610424	0.104902	0.234899	0.266235	0.234642	0.203147	0.216858	0.219087	0.0448642	0.128909	0.26975	0.237566	0.111279	0.185375	0.314248	0.337363	0.152725	0.187503	0.0661584	0.292845	0.243796	0.220232	0.255266	0.23653	0.203123	0.191854	0.315755	0.21814	1	0.31797
Benefits	-0.033467	0.125267	0.130021	0.0570655	0.240078	0.128914	0.110694	0.135266	0.129065	0.247498	0.268397	0.297055	0.184105	0.347063	0.314417	0.351557	0.00481991	0.288763	0.255486	0.288096	0.0893572	0.205781	0.221287	0.286548	0.115152	0.304837	0.249058	0.191286	0.31797	1

## Sheet: inhibit
Inhibitors	Sense of achievement	Recognition by the leader or employees	Overview of workflow	Responsibility	Possibility of promotion	Personal growth	Strategy	Organised company	Minimum supervision	Relations with superiors	Favorable working conditions	Salary	Relationships with colleagues	Free time	Reputable own status	Job security	Independence at work	Business trips	Socially useful work	Pride on the organization	Interesting work	Teamwork	Participation in the management of the company	Praise from superiors and colleagues	Work as a challenge	Entertaining job	Flexible working time	Helpful coworkers	High-tech	Benefits
Sense of achievement	1	0.402458	0.319075	0.557666	0.346896	0.492545	0.228947	0.343805	0.308699	0.415799	0.354385	0.2895	0.370085	0.166485	0.406341	0.236105	0.308333	0.0936701	0.266591	0.454386	0.394523	0.252105	0.237678	0.509721	0.376349	0.28776	0.124936	0.414495	0.172583	0.103253
Recognition by the leader or employees	0.402458	1	0.292365	0.329592	0.404189	0.321052	0.355633	0.326198	0.306294	0.484492	0.343152	0.328738	0.447149	0.259021	0.513753	0.278268	0.200045	0.147292	0.198477	0.407565	0.253222	0.301185	0.261868	0.63728	0.179704	0.168996	0.267492	0.360407	0.200096	0.223329
Overview of workflow	0.319075	0.292365	1	0.353282	0.283983	0.192282	0.367202	0.400203	0.153866	0.278072	0.31295	0.189783	0.267039	0.123498	0.325768	0.201991	0.244188	0.0945488	0.18347	0.314322	0.331358	0.295205	0.579322	0.23838	0.220765	0.201431	0.294736	0.291657	0.237459	0.0858325
Responsibility	0.557666	0.329592	0.353282	1	0.385153	0.442172	0.40562	0.352655	0.272849	0.330553	0.300136	0.26052	0.363239	0.166629	0.331625	0.215181	0.294591	0.280152	0.316202	0.493184	0.348945	0.390577	0.36318	0.390647	0.384625	0.209082	0.261223	0.379532	0.316846	0.244268
Possibility of promotion	0.346896	0.404189	0.283983	0.385153	1	0.427399	0.36244	0.269937	0.326042	0.31986	0.373307	0.572867	0.276059	0.254178	0.450861	0.412568	0.208994	0.349361	0.232934	0.380853	0.381013	0.229791	0.347362	0.375682	0.308477	0.264102	0.283382	0.321137	0.329225	0.317617
Personal growth	0.492545	0.321052	0.192282	0.442172	0.427399	1	0.229108	0.342014	0.260813	0.409275	0.334197	0.278816	0.358413	0.158766	0.298487	0.208672	0.200355	0.273706	0.234869	0.459863	0.363459	0.323816	0.287012	0.414612	0.286783	0.123697	0.128405	0.438061	0.240809	0.272376
Strategy	0.228947	0.355633	0.367202	0.40562	0.36244	0.229108	1	0.231826	0.199786	0.136491	0.223053	0.149019	0.125702	0.0602361	0.319028	0.102776	0.253627	0.332856	0.222671	0.306925	0.233942	0.49089	0.455584	0.291165	0.231914	0.210479	0.19158	0.163019	0.282327	0.31162
Organised company	0.343805	0.326198	0.400203	0.352655	0.269937	0.342014	0.231826	1	0.416322	0.356016	0.452258	0.379127	0.405112	0.271811	0.291172	0.223713	0.356867	0.117439	0.189627	0.391619	0.330867	0.220257	0.519143	0.272906	0.250098	0.162127	0.181007	0.391948	0.255938	0.196455
Minimum supervision	0.308699	0.306294	0.153866	0.272849	0.326042	0.260813	0.199786	0.416322	1	0.33526	0.422449	0.393706	0.328347	0.391334	0.29293	0.269947	0.393764	0.177548	0.290409	0.239514	0.309613	0.153961	0.24396	0.262289	0.16343	0.20033	0.29409	0.331132	0.213527	0.223037
Relations with superiors	0.415799	0.484492	0.278072	0.330553	0.31986	0.409275	0.136491	0.356016	0.33526	1	0.514179	0.367355	0.759937	0.314421	0.45377	0.335524	0.190208	0.0280253	0.236499	0.322349	0.366118	0.23291	0.252259	0.416591	0.292677	0.230826	0.176777	0.724532	0.142004	0.103254
Favorable working conditions	0.354385	0.343152	0.31295	0.300136	0.373307	0.334197	0.223053	0.452258	0.422449	0.514179	1	0.448897	0.545047	0.399245	0.363519	0.346424	0.320525	0.135108	0.28864	0.26096	0.508904	0.351638	0.351258	0.271838	0.2623	0.374741	0.288236	0.51101	0.302208	0.300078
Salary	0.2895	0.328738	0.189783	0.26052	0.572867	0.278816	0.149019	0.379127	0.393706	0.367355	0.448897	1	0.401456	0.444352	0.393642	0.423709	0.229771	0.218498	0.176122	0.242053	0.314726	0.110468	0.228601	0.344864	0.144457	0.209612	0.307034	0.348684	0.296904	0.271094
Relationships with colleagues	0.370085	0.447149	0.267039	0.363239	0.276059	0.358413	0.125702	0.405112	0.328347	0.759937	0.545047	0.401456	1	0.365327	0.314718	0.343061	0.216642	0.0516606	0.215337	0.238601	0.445103	0.276746	0.298104	0.369258	0.300913	0.268261	0.196434	0.73845	0.195822	0.158704
Free time	0.166485	0.259021	0.123498	0.166629	0.254178	0.158766	0.0602361	0.271811	0.391334	0.314421	0.399245	0.444352	0.365327	1	0.194461	0.412469	0.243063	0.0815553	0.207318	0.190857	0.239423	0.0845397	0.127381	0.239215	0.0414205	0.241225	0.216914	0.362427	0.178876	0.236601
Reputable own status	0.406341	0.513753	0.325768	0.331625	0.450861	0.298487	0.319028	0.291172	0.29293	0.45377	0.363519	0.393642	0.314718	0.194461	1	0.282967	0.292017	0.21977	0.195091	0.353324	0.315608	0.210514	0.346681	0.40482	0.32612	0.208811	0.38356	0.349181	0.274725	0.163558
Job security	0.236105	0.278268	0.201991	0.215181	0.412568	0.208672	0.102776	0.223713	0.269947	0.335524	0.346424	0.423709	0.343061	0.412469	0.282967	1	0.125384	0.158988	0.0834477	0.303832	0.25572	0.135711	0.14721	0.300713	0.146151	0.243775	0.129604	0.359367	0.2289	0.344585
Independence at work	0.308333	0.200045	0.244188	0.294591	0.208994	0.200355	0.253627	0.356867	0.393764	0.190208	0.320525	0.229771	0.216642	0.243063	0.292017	0.125384	1	0.177086	0.322317	0.226534	0.255332	0.169013	0.205547	0.180378	0.129448	0.144266	0.1427	0.273519	0.269005	0.123161
Business trips	0.0936701	0.147292	0.0945488	0.280152	0.349361	0.273706	0.332856	0.117439	0.177548	0.0280253	0.135108	0.218498	0.0516606	0.0815553	0.21977	0.158988	0.177086	1	0.336127	0.224357	0.265986	0.29732	0.157636	0.208603	0.148929	0.280167	0.228552	0.0534323	0.403385	0.454151
Socially useful work	0.266591	0.198477	0.18347	0.316202	0.232934	0.234869	0.222671	0.189627	0.290409	0.236499	0.28864	0.176122	0.215337	0.207318	0.195091	0.0834477	0.322317	0.336127	1	0.280598	0.266592	0.281708	0.199761	0.228407	0.16053	0.344812	0.185681	0.184469	0.21193	0.202689
Pride on the organization	0.454386	0.407565	0.314322	0.493184	0.380853	0.459863	0.306925	0.391619	0.239514	0.322349	0.26096	0.242053	0.238601	0.190857	0.353324	0.303832	0.226534	0.224357	0.280598	1	0.261955	0.295286	0.326614	0.567177	0.257053	0.260679	0.188289	0.301044	0.377762	0.350361
Interesting work	0.394523	0.253222	0.331358	0.348945	0.381013	0.363459	0.233942	0.330867	0.309613	0.366118	0.508904	0.314726	0.445103	0.239423	0.315608	0.25572	0.255332	0.265986	0.266592	0.261955	1	0.211941	0.356587	0.234916	0.472115	0.579888	0.198615	0.439817	0.26192	0.217095
Teamwork	0.252105	0.301185	0.295205	0.390577	0.229791	0.323816	0.49089	0.220257	0.153961	0.23291	0.351638	0.110468	0.276746	0.0845397	0.210514	0.135711	0.169013	0.29732	0.281708	0.295286	0.211941	1	0.27764	0.313614	0.232267	0.217241	0.196425	0.293858	0.369251	0.237963
Participation in the management of the company	0.237678	0.261868	0.579322	0.36318	0.347362	0.287012	0.455584	0.519143	0.24396	0.252259	0.351258	0.228601	0.298104	0.127381	0.346681	0.14721	0.205547	0.157636	0.199761	0.326614	0.356587	0.27764	1	0.162384	0.328021	0.235155	0.252414	0.299175	0.273859	0.180912
Praise from superiors and colleagues	0.509721	0.63728	0.23838	0.390647	0.375682	0.414612	0.291165	0.272906	0.262289	0.416591	0.271838	0.344864	0.369258	0.239215	0.40482	0.300713	0.180378	0.208603	0.228407	0.567177	0.234916	0.313614	0.162384	1	0.157263	0.174928	0.197113	0.341691	0.200447	0.280115
Work as a challenge	0.376349	0.179704	0.220765	0.384625	0.308477	0.286783	0.231914	0.250098	0.16343	0.292677	0.2623	0.144457	0.300913	0.0414205	0.32612	0.146151	0.129448	0.148929	0.16053	0.257053	0.472115	0.232267	0.328021	0.157263	1	0.216608	0.181611	0.354527	0.166244	0.0646092
Entertaining job	0.28776	0.168996	0.201431	0.209082	0.264102	0.123697	0.210479	0.162127	0.20033	0.230826	0.374741	0.209612	0.268261	0.241225	0.208811	0.243775	0.144266	0.280167	0.344812	0.260679	0.579888	0.217241	0.235155	0.174928	0.216608	1	0.18088	0.309691	0.283226	0.304988
Flexible working time	0.124936	0.267492	0.294736	0.261223	0.283382	0.128405	0.19158	0.181007	0.29409	0.176777	0.288236	0.307034	0.196434	0.216914	0.38356	0.129604	0.1427	0.228552	0.185681	0.188289	0.198615	0.196425	0.252414	0.197113	0.181611	0.18088	1	0.17544	0.216928	0.30183
Helpful coworkers	0.414495	0.360407	0.291657	0.379532	0.321137	0.438061	0.163019	0.391948	0.331132	0.724532	0.51101	0.348684	0.73845	0.362427	0.349181	0.359367	0.273519	0.0534323	0.184469	0.301044	0.439817	0.293858	0.299175	0.341691	0.354527	0.309691	0.17544	1	0.203235	0.153609
High-tech	0.172583	0.200096	0.237459	0.316846	0.329225	0.240809	0.282327	0.255938	0.213527	0.142004	0.302208	0.296904	0.195822	0.178876	0.274725	0.2289	0.269005	0.403385	0.21193	0.377762	0.26192	0.369251	0.273859	0.200447	0.166244	0.283226	0.216928	0.203235	1	0.347144
Benefits	0.103253	0.223329	0.0858325	0.244268	0.317617	0.272376	0.31162	0.196455	0.223037	0.103254	0.300078	0.271094	0.158704	0.236601	0.163558	0.344585	0.123161	0.454151	0.202689	0.350361	0.217095	0.237963	0.180912	0.280115	0.0646092	0.304988	0.30183	0.153609	0.347144	1

## Sheet: together
	Inhibitors
Motivators	Sense of achievement	Recognition by the leader or employees	Overview of workflow	Responsibility	Possibility of promotion	Personal growth	Strategy	Organised company	Minimum supervision	Relations with superiors	Favorable working conditions	Salary	Relationships with colleagues	Free time	Reputable own status	Job security	Independence at work	Business trips	Socially useful work	Pride on the organization	Interesting work	Teamwork	Participation in the management of the company	Praise from superiors and colleagues	Work as a challenge	Entertaining job	Flexible working time	Helpful coworkers	High-tech	Benefits
Sense of achievement	0.400794	0.183491	0.171509	0.162857	0.0670839	0.20153	0.0232359	0.119806	0.074757	0.325144	0.0976584	0.0863063	0.294016	0.0293354	0.141926	0.0216232	0.0995993	-0.0934028	0.0280146	0.179102	0.189367	0.0612573	0.0810788	0.129691	0.265488	0.10456	-0.0404224	0.337062	0.00130274	-0.155396
Recognition by the leader or employees	0.335605	0.404665	0.224824	0.262536	0.267484	0.204646	0.14101	0.190993	0.187813	0.40085	0.237487	0.238412	0.323249	0.264892	0.26949	0.258725	0.0672666	-0.0480792	0.073445	0.387973	0.131223	0.211002	0.195281	0.454158	0.114764	0.139645	0.0827052	0.33537	0.0621339	0.12187
Overview of workflow	0.321034	0.134828	0.380484	0.263954	0.159257	0.216403	0.185257	0.239646	0.1519	0.205935	0.215347	0.0884162	0.17609	0.0796586	0.179911	0.036958	0.152119	0.0421451	0.0947897	0.219513	0.220379	0.108698	0.235339	0.182845	0.237704	0.0896547	0.145247	0.239499	0.137317	0.0315681
Responsibility	0.316311	0.114273	0.215548	0.394047	0.159704	0.227873	0.178993	0.106857	0.0483994	0.0641623	0.0953417	0.0785918	0.0761841	-0.0621695	0.165577	0.072124	0.0950265	0.115752	0.056254	0.296903	0.207076	0.120641	0.153145	0.15073	0.199193	0.0982219	0.0867642	0.0827476	0.136071	-0.0232566
Possibility of promotion	0.116258	0.206923	0.135363	0.163901	0.452487	0.174806	0.178457	0.125726	0.135541	0.0817332	0.126921	0.296196	0.00380079	0.0857884	0.208403	0.197943	0.0109158	0.154889	0.0291117	0.263912	0.0758622	0.0663287	0.148167	0.264983	0.119077	0.0408984	0.108496	0.0658751	0.145859	0.209487
Personal growth	0.283877	0.182257	0.135911	0.257134	0.262938	0.487287	0.180066	0.157263	0.152018	0.128844	0.146269	0.10013	0.132546	0.0192659	0.122786	0.0563354	0.129532	0.222132	0.0820641	0.262408	0.276305	0.200942	0.123124	0.257479	0.303886	0.0957571	0.0411365	0.205221	0.129665	0.0432622
Strategy	0.14986	0.156686	0.26479	0.233218	0.273413	0.296022	0.325875	0.294229	0.157976	0.16477	0.213975	0.0669139	0.19358	-0.0438518	0.129689	0.10843	0.109308	0.170838	0.0563861	0.237948	0.223994	0.241554	0.425827	0.0743345	0.273907	0.132744	0.141339	0.218838	0.118358	0.119731
Organised company	0.216193	0.23782	0.297365	0.211995	0.23944	0.336615	0.249256	0.328222	0.180595	0.28373	0.346675	0.103879	0.249368	0.132373	0.228424	0.160348	0.179345	0.145737	0.0578513	0.328464	0.205882	0.243818	0.317619	0.20735	0.177669	0.150775	0.118459	0.30834	0.157662	0.0869632
Minimum supervision	0.0961394	0.15364	0.0740092	0.193352	0.166648	0.170534	0.173862	0.109926	0.325998	0.196337	0.187456	0.146297	0.172353	0.171853	0.110436	0.145346	0.157341	0.166022	0.229289	0.192613	0.134385	0.113262	0.111364	0.128661	0.0868461	0.105489	0.0631951	0.185481	0.0566577	0.0661199
Relations with superiors	0.203836	0.330202	0.178579	0.149765	0.15041	0.220036	0.13885	0.202455	0.231512	0.488897	0.3205	0.1976	0.377881	0.141052	0.256411	0.224117	0.0807865	0.0519774	0.103793	0.308514	0.144686	0.22171	0.145638	0.355435	0.171537	0.0799403	0.137091	0.374298	0.0869162	0.0705636
Favorable working conditions	0.171558	0.199599	0.154165	0.0482013	0.158633	0.158142	0.0841882	0.197359	0.22604	0.325596	0.433228	0.291703	0.278999	0.293972	0.159128	0.266401	0.0544591	0.0264957	0.0175384	0.177957	0.13637	0.14445	0.0811816	0.213743	0.0820176	0.120953	0.164804	0.287691	0.10869	0.112259
Salary	0.082138	0.224427	-0.0106678	-0.0187974	0.304231	0.150542	0.00544389	0.155955	0.192709	0.165965	0.282631	0.483824	0.176548	0.278489	0.173708	0.202439	-0.0236768	0.0631245	-0.00136979	0.0443408	0.0417267	0.0600554	0.0884917	0.160937	-0.0101367	0.0781812	0.175729	0.176742	0.127369	0.180993
Relationships with colleagues	0.196021	0.277847	0.134876	0.0965279	0.0972097	0.265242	0.0407416	0.128904	0.182589	0.387733	0.298221	0.194159	0.426046	0.245525	0.216795	0.174389	0.0277723	-0.00441789	0.133322	0.210886	0.16253	0.234467	0.112752	0.305379	0.0641764	0.0880955	0.155496	0.361316	0.107162	0.0894244
Free time	0.0879286	0.144492	0.137938	0.0600649	0.140372	0.0438367	0.0168125	0.129978	0.235879	0.180256	0.294715	0.312755	0.262678	0.586842	0.0918188	0.308063	0.0918852	0.0549248	0.171459	0.0901715	0.136201	0.0440274	0.102532	0.123345	-0.0169484	0.123191	0.173795	0.224601	0.152576	0.170927
Reputable own status	0.188864	0.2454	0.195877	0.205944	0.289636	0.149378	0.251798	0.0793963	0.0855217	0.122639	0.103555	0.294915	0.145044	0.192138	0.40189	0.246262	0.0749563	0.222467	-0.0110276	0.205615	0.127423	0.060531	0.120549	0.253504	0.0786542	0.0850454	0.111641	0.170156	0.245896	0.185358
Job security	0.201394	0.195127	0.102491	0.151084	0.243361	0.076047	0.0389347	0.1313	0.114185	0.187389	0.304315	0.293584	0.219261	0.28083	0.176994	0.472618	0.0739714	0.0802497	0.0588416	0.207632	0.100871	0.115363	0.0331091	0.24751	0.0425595	0.131716	0.114677	0.216232	0.180483	0.188626
Independence at work	0.200478	0.0914916	0.156525	0.250887	0.104413	0.200376	0.209762	0.134229	0.211717	0.127729	0.174378	0.0103781	0.122917	0.0958949	0.130971	0.0140047	0.243471	0.0499994	0.137861	0.106735	0.142395	0.14291	0.105069	0.0996757	0.143137	0.00414828	-0.0194943	0.190152	0.121955	-0.059001
Business trips	0.126822	0.168301	0.0557922	0.171155	0.221281	0.199969	0.227287	0.125335	0.122648	0.0374285	0.0557804	0.125387	0.0133635	-0.00629298	0.176439	0.043341	0.105169	0.650019	0.22015	0.130503	0.107295	0.174154	0.0840197	0.151548	0.0391098	0.148239	0.115273	0.0146657	0.11642	0.262347
Socially useful work	0.104646	0.0978627	-0.0140707	0.0800306	0.110333	0.194987	0.107805	0.0173148	0.112258	0.0976156	0.0309892	0.0629629	0.106413	0.0584682	0.087223	0.0534218	-0.00777099	0.255145	0.435576	0.146044	0.053934	0.211231	-0.00820355	0.140679	0.0566735	0.2117	0.0373093	0.0519944	0.0388824	0.138579
Pride on the organization	0.190284	0.173929	0.155884	0.283408	0.157083	0.247174	0.235144	0.162663	0.0125847	0.103572	0.149397	0.093945	0.102392	0.0189389	0.149826	0.184496	0.026926	0.160619	0.115017	0.426519	0.0685134	0.34338	0.165535	0.201717	0.100916	0.160039	0.0306944	0.126542	0.275818	0.213897
Interesting work	0.266149	0.185064	0.224722	0.182391	0.150784	0.31424	0.116071	0.263545	0.1247	0.281202	0.288212	0.147461	0.312464	0.164234	0.165699	0.158646	0.154661	0.00733567	0.0320777	0.160519	0.303277	0.113494	0.190696	0.160585	0.233257	0.119211	0.0643248	0.282185	0.107122	0.008083
Teamwork	0.09137	0.14606	0.155336	0.230268	0.129384	0.253446	0.18632	0.109216	0.0678919	0.169089	0.148712	0.031146	0.275505	0.0629334	0.0263791	0.0359821	0.0884887	0.170946	0.111876	0.225315	0.0934539	0.529137	0.139292	0.186454	0.113215	0.0807259	0.03975	0.193575	0.196993	0.135683
Participation in the management of the company	0.104494	0.161266	0.190128	0.319338	0.223	0.162247	0.600185	0.129079	0.0718552	0.0440372	0.0495752	0.0588612	0.0508786	-0.0778757	0.186211	0.0584502	0.0548207	0.305027	0.0514961	0.285453	0.07172	0.357679	0.238527	0.158104	0.1975	0.0692448	0.0970103	0.0339221	0.144358	0.176535
Praise from superiors and colleagues	0.324804	0.476694	0.24698	0.216729	0.256795	0.218532	0.244688	0.13867	0.132083	0.342494	0.191866	0.221697	0.291479	0.139361	0.31253	0.260373	0.0200043	0.0937313	0.0414648	0.366699	0.0468661	0.261465	0.134992	0.554004	0.0583395	0.100453	0.10724	0.253917	0.0848264	0.143778
Work as a challenge	0.301744	0.156808	0.144543	0.335129	0.127113	0.388673	0.216638	0.143979	0.0446697	0.142838	0.185557	-0.0148807	0.17977	-0.119839	0.106753	-0.0513812	0.0992235	0.0643753	0.0477369	0.223047	0.28196	0.283327	0.187073	0.159086	0.357871	0.0882849	0.00361368	0.184895	0.127803	0.0704777
Entertaining job	0.140929	0.178518	0.0303119	0.0543915	0.0803673	0.0982525	0.0946844	0.126988	0.0985926	0.222695	0.265691	0.121896	0.208704	0.167495	0.0526099	0.0923217	0.015174	0.0398949	0.086189	0.187788	0.232127	0.102971	0.0424396	0.153557	0.0778342	0.469185	-0.00302487	0.186507	0.00376927	0.215532
Flexible working time	0.0427338	0.0442341	0.0584721	0.168626	0.036404	0.0929684	0.0666727	0.0464462	0.0843629	0.178591	0.211219	0.182614	0.161765	0.0727701	0.0984988	0.0303001	0.0466883	0.161248	0.0848667	0.0643939	0.0925975	0.132014	0.0630194	0.0765917	0.0214136	0.130466	0.34716	0.114331	0.0830829	0.146797
Helpful coworkers	0.210325	0.213301	0.271711	0.121626	0.0897596	0.22604	0.0489334	0.187902	0.147025	0.360592	0.287485	0.137743	0.379752	0.111626	0.163658	0.217665	0.0741972	-0.0271378	0.150177	0.228601	0.145421	0.22436	0.153253	0.211001	0.112851	0.116881	0.141671	0.326237	0.0158382	0.0319732
High-tech	0.047025	0.084594	0.148906	0.181853	0.0467262	0.053653	0.154329	0.124266	0.0416593	0.0435915	0.161454	0.0752385	0.0839029	0.0717307	0.102455	0.157265	0.105372	0.191889	-0.0202314	0.163774	0.00623249	0.187929	0.105108	0.0706037	0.0615772	0.0612205	0.0625286	0.0945645	0.514648	0.0908271
Benefits	0.0455281	0.141105	-0.0155249	0.126279	0.154619	0.111569	0.124812	0.0663722	0.0655769	0.130485	0.186945	0.200655	0.162814	0.191195	0.115349	0.200653	-0.00829584	0.259399	0.134041	0.193655	0.0698962	0.129022	0.0443071	0.204085	0.0150298	0.200539	0.200439	0.130024	0.221511	0.601469
